# Supplementary material for: Laser directed lithography of asymmetric graphene ribbons on a polydimethylsiloxane trench structure
Source: Royal Society of Chemistry journal article supplement (doi:10.1039/c3cp50538c), 2013-01-01
Supplement: c3cp50538c.pdf [file c3cp50538c.pdf]

# Direct Laser Lithography of Asymmetric Graphene Ribbons on a Polydimethylsiloxane Trench Structure

## —Supplementary Information

He Tian,<sup>1,2</sup> Yi Yang,<sup>1</sup> Dan Xie,<sup>1</sup> Tian-Ling Ren,<sup>1,\*</sup> Yi Shu,<sup>1</sup> Hui Sun,<sup>1</sup> Chang-Jian Zhou,<sup>1</sup>

Xuan Liu,<sup>1</sup> Lu-Qi Tao,<sup>1</sup> Jie Ge,<sup>1</sup> Cang-Hai Zhang<sup>1</sup>, Yuegang Zhang,<sup>2,‡,\*</sup>

<sup>1</sup>Institute of Microelectronics, Tsinghua University, Beijing 100084, China and Tsinghua

National Laboratory for Information Science and Technology (TNList), Tsinghua

University, Beijing 100084, China

<sup>2</sup>The Molecular Foundry, Lawrence Berkeley National Laboratory, 1 Cyclotron Road,

Berkeley, CA 94720, USA

<sup>‡</sup> Current address: Suzhou Institute of Nano-Tech and Nano-Bionics, Chinese Academy of  
Sciences, Suzhou 215123, China. E-mail: ygzhang2012@sinano.ac.cn

\*Corresponding Author E-mail: [RenTL@tsinghua.edu.cn](mailto:RenTL@tsinghua.edu.cn), [yzhang5@lbl.gov](mailto:yzhang5@lbl.gov)

**This file includes:**

SUPPLEMENTARY FIG. S1-S2

## SUPPLEMENTARY FIGURES AND CAPTIONS

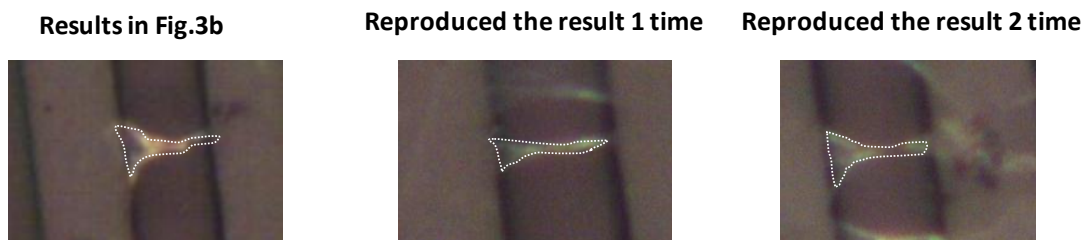

**Figure S1** | The reproducibility of direct laser lithography of asymmetric graphene ribbons. The results showing that the triangular shaped structures could be reproduced for multi-times.

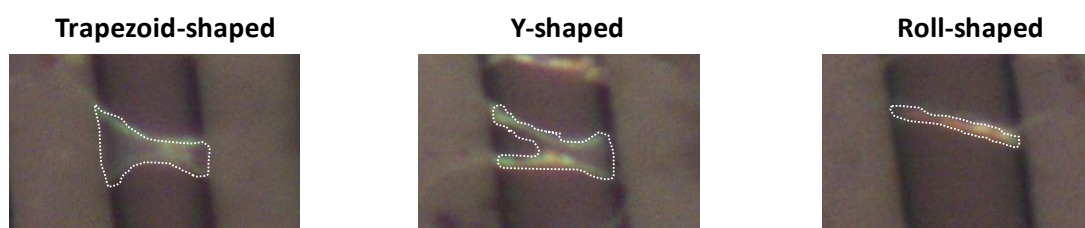

**Figure S2** | The flexibility of direct laser lithography of asymmetric graphene ribbons. The results showing that the trapezoid-shaped, Y-shaped and roll-shaped could also be fabricated.
